# Supplementary material
Source: PubMed Central journal article supplement (PMC2565714)
Supplement: supp_179_9_901_v2_1.pdf [file supp_179_9_901_v2_1.pdf]

**Appendix 1:** Odds ratios from multilevel logistic regression model for 90-day use of beta-blockers, angiotensin modifying agents and statins in 2005/06

| Characteristic                    | -blockers;<br>OR (95% CI) | p value | ACE/ARB;<br>OR (95% CI) | p value | Statins;<br>OR (95% CI) | p value |
|-----------------------------------|---------------------------|---------|-------------------------|---------|-------------------------|---------|
| <b>Patient characteristics</b>    |                           |         |                         |         |                         |         |
| Age, yr                           | 0.98 (0.97–0.99)          | < 0.001 | 0.97 (0.97–0.98)        | < 0.001 | 0.94 (0.93–0.95)        | < 0.001 |
| Female                            | 1.05 (0.94–1.16)          | 0.409   | 1.03 (0.92–1.14)        | 0.614   | 0.85 (0.76–0.95)        | 0.005   |
| Shock                             | 0.91 (0.47–1.75)          | 0.781   | 1.35 (0.66–2.75)        | 0.409   | 1.36 (0.64–2.91)        | 0.424   |
| Congestive heart failure          | 0.89 (0.79–1)             | 0.051   | 1.13 (1–1.28)           | 0.053   | 0.69 (0.61–0.78)        | < 0.001 |
| Cancer                            | 0.69 (0.52–0.91)          | 0.008   | 0.49 (0.38–0.64)        | < 0.001 | 0.38 (0.29–0.5)         | < 0.001 |
| Cerebrovascular disease           | 0.89 (0.66–1.19)          | 0.438   | 0.88 (0.66–1.19)        | 0.415   | 0.78 (0.57–1.06)        | 0.107   |
| Pulmonary edema                   | 0.78 (0.47–1.28)          | 0.326   | 1.72 (0.94–3.15)        | 0.081   | 0.66 (0.4–1.09)         | 0.106   |
| Acute renal failure               | 0.9 (0.72–1.13)           | 0.381   | 0.54 (0.44–0.66)        | < 0.001 | 0.74 (0.59–0.93)        | 0.009   |
| Chronic renal failure             | 0.87 (0.72–1.06)          | 0.179   | 0.39 (0.32–0.46)        | < 0.001 | 0.84 (0.69–1.03)        | 0.093   |
| Diabetes with complications       | 1.12 (0.87–1.44)          | 0.371   | 1 (0.79–1.26)           | 0.999   | 0.94 (0.73–1.21)        | 0.610   |
| Cardiac dysrhythmias              | 0.8 (0.71–0.92)           | 0.001   | 0.86 (0.75–0.98)        | 0.027   | 0.76 (0.66–0.87)        | < 0.001 |
| <b>Physician characteristics</b>  |                           |         |                         |         |                         |         |
| GP/FP vs. cardiologist            | 0.69 (0.55–0.87)          | 0.001   | 0.77 (0.61–0.97)        | 0.024   | 0.46 (0.35–0.59)        | < 0.001 |
| General internist v. cardiologist | 0.77 (0.64–0.92)          | 0.005   | 0.82 (0.68–0.98)        | 0.028   | 0.7 (0.56–0.86)         | 0.001   |
| Other specialty v. cardiologist   | 0.76 (0.61–0.94)          | 0.011   | 0.74 (0.6–0.92)         | 0.007   | 0.64 (0.5–0.82)         | < 0.001 |
| Female physician                  | 1.01 (0.86–1.2)           | 0.869   | 1.07 (0.9–1.26)         | 0.443   | 0.98 (0.82–1.17)        | 0.790   |
| 1-5 AMI patients/year             | 0.98 (0.78–1.24)          | 0.898   | 0.89 (0.71–1.12)        | 0.322   | 0.82 (0.63–1.07)        | 0.145   |
| 6-17 AMI patients/year            | 1 (0.82–1.22)             | 1.000   | 1.04 (0.85–1.27)        | 0.698   | 0.94 (0.74–1.19)        | 0.582   |
| 18-32 AMI patients/year           | 1 (0.83–1.21)             | 0.999   | 0.96 (0.8–1.15)         | 0.654   | 1.04 (0.83–1.31)        | 0.723   |
| 15-22 years clinical experience   | 0.98 (0.83–1.15)          | 0.775   | 1.01 (0.86–1.18)        | 0.921   | 1.13 (0.95–1.36)        | 0.173   |
| 23-28 years clinical experience   | 0.88 (0.74–1.04)          | 0.130   | 1.08 (0.91–1.28)        | 0.366   | 0.89 (0.74–1.08)        | 0.245   |
| 29 years clinical experience      | 0.71 (0.6–0.84)           | < 0.001 | 0.86 (0.74–1.01)        | 0.074   | 0.81 (0.67–0.97)        | 0.019   |
| <b>Hospital characteristics</b>   |                           |         |                         |         |                         |         |
| Catheterization-only capacity     | 0.63 (0.47–0.85)          | 0.002   | 0.71 (0.54–0.92)        | 0.011   | 1 (0.67–1.51)           | 0.987   |
| Revascularization capacity        | 0.92 (0.67–1.25)          | 0.575   | 0.9 (0.69–1.17)         | 0.431   | 1.04 (0.71–1.53)        | 0.853   |
| Teaching hospital                 | 1.22 (0.88–1.69)          | 0.241   | 1.16 (0.88–1.53)        | 0.283   | 1.64 (1.14–2.34)        | 0.007   |
| 100 AMI patients per year         | 0.87 (0.6–1.26)           | 0.471   | 0.89 (0.64–1.24)        | 0.484   | 1.51 (0.95–2.38)        | 0.080   |
| 101-200 AMI patients per year     | 0.98 (0.7–1.38)           | 0.909   | 0.93 (0.69–1.26)        | 0.632   | 1.28 (0.83–1.99)        | 0.268   |
| 201-300 AMI patients per year     | 1.06 (0.82–1.36)          | 0.658   | 0.93 (0.75–1.17)        | 0.549   | 1.31 (0.93–1.83)        | 0.118   |
| <b>Community characteristics</b>  |                           |         |                         |         |                         |         |
| 500,000 – 1,249,999               | 1.05 (0.5–2.19)           | 0.894   | 0.8 (0.49–1.32)         | 0.388   | 0.96 (0.6–1.55)         | 0.875   |
| 100,000 – 499,999                 | 0.98 (0.54–1.77)          | 0.935   | 0.82 (0.56–1.22)        | 0.333   | 0.79 (0.56–1.11)        | 0.171   |
| < 100,000                         | 0.97 (0.53–1.81)          | 0.933   | 0.97 (0.64–1.47)        | 0.884   | 0.75 (0.51–1.1)         | 0.138   |
